1 **Genetic architecture and lifetime dynamics of inbreeding depression in a wild mammal**

2

3

4 Authors names and addresses:

5

6 Stoffel, M.A.<sup>1\*</sup>, Johnston, S.E.<sup>1</sup>, Pilkington, J.G.<sup>1</sup>, Pemberton, J.M.<sup>1</sup>

7

8 <sup>1</sup>Institute of Evolutionary Biology, School of Biological Sciences, University of Edinburgh,

9 Edinburgh, EH9 3FL, United Kingdom

10

11

12

13

14

15

16

17

18

19

20

21 \* Corresponding author:

22 Martin A. Stoffel

23 Postal address: Institute of Evolutionary Biology, University of Edinburgh, Edinburgh, EH9 3FL, UK

24 E-mail: martin.stoffel@ed.ac.uk

25 **Abstract**

26 Inbreeding depression is a phenomenon of long-standing importance, but we know surprisingly  
27 little about its genetic architecture, precise effects and life-history dynamics in wild populations.  
28 Here, we combined 417K imputed SNP genotypes for 5952 wild Soay sheep with detailed long-term  
29 life-history data to explore inbreeding depression on a key fitness component, annual survival.  
30 Inbreeding manifests in long runs of homozygosity (ROH) and these are abundant in Soay sheep,  
31 covering on average 24% of the autosomal genome and up to 50% in the most inbred individuals.  
32 The ROH landscape is shaped by recombination rate variation and differs widely across the genome,  
33 including islands where up to 87% of the population have an ROH and deserts where the ROH  
34 prevalence is as low as 4%. We next quantified individual inbreeding as the proportion of the  
35 autosomal genome in ROH ( $F_{ROH}$ ) and estimated its effect on annual survival. The consequences of  
36 inbreeding are severe; a 10% increase in  $F_{ROH}$  was associated with a 68% [95% CI 55-78%] decrease  
37 in the odds of survival. However, the strength of inbreeding depression is dynamic across the  
38 lifespan. We estimate depression to peak in young adults, to decrease into older ages and to be  
39 weaker in lambs, where inbreeding effects are possibly buffered by maternal care. Finally, using a  
40 genome-wide association scan on ROH, we show that inbreeding causes depression predominantly  
41 through many loci with small effects, but we also find three regions in the genome with putatively  
42 strongly deleterious mutations. Our study reveals population and genome-wide patterns of  
43 homozygosity caused by inbreeding and sheds light on the strength, dynamics and genetic  
44 architecture of inbreeding depression in a wild mammal population.

## 45 **Introduction**

46 Inbreeding depression, the reduced fitness of offspring from related parents, has been a core theme  
47 in evolutionary and conservation biology since Darwin <sup>1</sup>. The detrimental effects of inbreeding on a  
48 broad range of traits, individual fitness and population viability have now been recognized all across  
49 the animal and plant kingdoms <sup>1-9</sup>. However, despite the ubiquity of inbreeding depression, we still  
50 know very little about its most fundamental features in wild populations <sup>7,10</sup>: What are the genomic  
51 patterns of homozygosity caused by inbreeding? How strong is inbreeding depression in fitness and  
52 how do its effects change across different life stages? What is the distribution of effect sizes at loci  
53 causing inbreeding depression?

54  
55 Inbreeding decreases fitness because it increases the fraction of the genome which is homozygous  
56 and identical-by-descent (IBD). This unmasks the effects of (partially-) recessive deleterious alleles or  
57 in rarer cases may decrease fitness at loci with heterozygote advantage <sup>4,11</sup>. While the probability of  
58 IBD at a genetic locus was traditionally estimated as the expected inbreeding coefficient based on a  
59 pedigree <sup>12,13</sup>, modern genomic approaches enable us to gain a much more detailed picture.  
60 Genome-wide markers or whole genome sequences are now unraveling the genomic mosaic of  
61 homo- and heterozygosity and, unlike pedigree-based approaches, capture individual variation in  
62 homozygosity due to the stochastic effects of Mendelian segregation and recombination <sup>10,14</sup>. This  
63 makes it possible to quantify realized rather than expected individual inbreeding, and can provide  
64 insights into how inbreeding causes IBD along the genome <sup>15,16</sup>.

65  
66 An intuitive and powerful way of measuring IBD is through runs of homozygosity (ROH), which are  
67 long stretches of homozygous genotypes <sup>17</sup>. ROH arise when two IBD haplotypes come together,  
68 which happens more frequently with increasing parental relatedness. However, ROH do not only  
69 originate from recent inbreeding, but can also emerge when shorter IBD haplotypes are inherited  
70 from apparently unrelated individuals due to background relatedness in the population.  
71 Consequently, ROH are ubiquitous even in outbred human populations <sup>18</sup>, and in cases of strong  
72 inbreeding can stretch along whole chromosomes, as observed in some Scandinavian wolves <sup>15</sup>. The  
73 proportion of the autosomal genome in ROH ( $F_{ROH}$ ) is an estimate of realized individual inbreeding  
74  $F$  <sup>19</sup> and has been used to uncover inbreeding depression in a wide range of traits in humans and  
75 farm animals <sup>5,20,21</sup>. While  $F_{ROH}$  condenses the information about an individual's IBD into a single  
76 number, the genomic location of ROH reflects where the genome is homozygous due to inbreeding  
77 and can therefore help to elucidate the genetic basis of inbreeding depression <sup>10,22</sup>.

78

79 A major challenge towards a better understanding of inbreeding depression is in mapping the  
80 underlying loci and estimating their effect sizes<sup>10</sup>. While simple recessive disease loci are relatively  
81 straightforward to identify through homozygosity mapping<sup>23,24</sup>, quantifying the genetic basis of  
82 inbreeding depression in fitness and complex traits requires large samples in addition to dense  
83 genomic data<sup>22</sup>. As a consequence, the genetic architecture of inbreeding depression has mostly  
84 been studied in humans and livestock<sup>25,26</sup>. However, individual fitness will be different under natural  
85 conditions and consequently there is a need to study inbreeding depression in wild populations to  
86 understand its genetic basis in an evolutionary and ecological context. To date, only a handful of  
87 studies have estimated inbreeding depression using genomic data in the wild<sup>27-31</sup>. While these  
88 studies show that inbreeding depression in wild populations is more prevalent and more severe than  
89 previously thought, all of them used genome-wide inbreeding coefficients and did not explore the  
90 underlying genetic basis of depression.

91  
92 Here, we combined long-term life-history data for 5952 free-living Soay sheep from the St. Kilda  
93 archipelago, Scotland, with over 417K partially imputed genome-wide SNP markers for a detailed  
94 genomic analysis of inbreeding depression. First, we quantified the genomic consequences of  
95 inbreeding through patterns of ROH among individuals and across the genome. We then calculated  
96 individual genomic inbreeding coefficients  $F_{ROH}$  to model inbreeding depression in annual survival  
97 and estimate its strength and dynamics across the lifetime. Finally, we explored the genetic  
98 architecture of inbreeding depression using a mixed-model based genome-wide association scan  
99 on ROH to shed light on whether depression is caused by many loci with small effects, few loci with  
100 large effects or a mixture of both.

101

102

## 103 **Results**

104 **Study population.** Soay sheep are descendants of early Bronze Age sheep and have lived on the  
105 island of Soay in the St Kilda Archipelago for thousands of years<sup>32</sup>. Although the Soays have been  
106 largely unmanaged, there is written and genomic evidence of an admixture event with the now  
107 extinct Dunface breed approximately 150 years or 32 generations ago<sup>33</sup>. Since 1985, the sheep  
108 inhabiting the Village Bay area of Hirta have been part of a long-term individual-based study<sup>32</sup>.  
109 Annual survival is assessed through routine mortality checks which are conducted throughout the  
110 year, and over 80% of sheep in the study area are found after their death<sup>27</sup>. For all following analyses  
111 we focused on a subset of 5952 sheep for which complete annual survival data and genomic data

112 were available. While many Soay sheep die early, some individuals live up to 15 years, resulting in a  
113 total of 15889 observations for annual survival (Supplementary Figure 1).

114

115 **Genotyping and imputation.** All study individuals have been genotyped on the Illumina Ovine  
116 SNP50 BeadChip containing 51,135 SNP markers. In addition, 189 individuals have been genotyped  
117 on the Ovine Infinium High-Density chip containing 606,066 SNPs. To increase the genomic  
118 resolution for our analyses, we combined autosomal genotypes from both SNP chips with pedigree  
119 information to impute missing SNPs in individuals genotyped at lower marker density using  
120 AlphaImpute<sup>34</sup>. Cross-validation showed that imputation was successful, with a median of 99.3%  
121 correctly imputed genotypes per individual (Supplementary Table 1). Moreover, the inferred  
122 inbreeding coefficients  $F_{ROH}$  were very similar when comparing individuals genotyped on the high-  
123 density chip (median  $F_{ROH} = 0.239$ ) and individuals with imputed SNPs (median  $F_{ROH} = 0.241$ ),  
124 indicating no obvious bias in the abundance of inferred ROH based on imputed data  
125 (Supplementary Figure 2). After quality control, the genomic dataset contained 417,373  
126 polymorphic and autosomal SNPs with a mean minor allele frequency (MAF) of 23% and a mean call  
127 rate of 99.5% across individuals.

128

129 **Patterns of inbreeding in the genome.** We first explored how inbreeding and a long-term small  
130 population size (estimated  $N_e = 194$ ,<sup>35</sup>) shaped patterns of ROH in Soay sheep (Figure 1). Individuals  
131 had a mean of 194 ROH (sd = 11.6) longer than 1.2 Mb, which on average made up 24% of the  
132 autosomal genome (i.e. mean  $F_{ROH} = 0.24$ , range = 0.18-0.50, Supplementary Figure 3). IBD in the  
133 1% most inbred individuals compared to the 1% least inbred individuals was characterized through  
134 longer ROH (mean: 5.27 Mb vs. 2.76 Mb), and slightly more abundant ROH (mean: 183 vs. 174).  
135 Figure 1A contrasts ROH longer than 5 Mb between the seven most and least inbred individuals,  
136 illustrating large differences in ROH length and coverage. The frequency of ROH in the population  
137 also varied widely across the genome (Figure 1B). We scanned ROH in the population in non-  
138 overlapping 500Kb windows, revealing regions with high ROH prevalence (ROH islands) and low  
139 ROH prevalence (ROH deserts) on every chromosome (Figure 1B). The top ROH island on  
140 chromosome 1 (227-227.5Mb) contained ROH in 87% of individuals, while only 4.4% of individuals  
141 had an ROH in the top ROH desert on chromosome 11 (58.5-59Mb, see Supplementary Table 2 for  
142 a list of the top ROH deserts and islands). Patterns of ROH on most chromosomes were shaped by  
143 recombination rate variation (Supplementary Figure 4). On average across the genome, a  
144 standardized (z-transformed) unit increase in recombination rate (measured as the summed fraction

145 of recombinants  $r$  in a window) was associated with a 2.3% decrease in ROH ( $\beta$  [95% confidence  
146 interval] = -0.023 [-0.026, -0.019], Supplementary Table 3 for model details).  
147

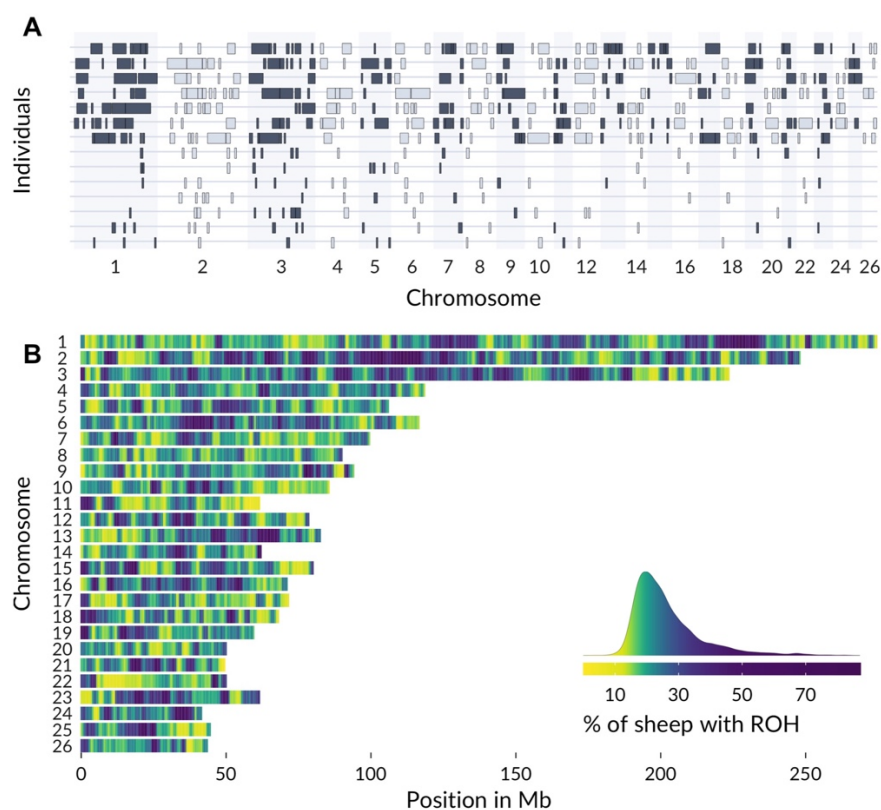

148  
149 **Figure 1: ROH variation (A) among the seven most and least inbred individuals and (B) across the Soay**  
150 **sheep genome.** Panel A shows ROH longer than 5 Mb in the seven individuals with the highest  $F_{ROH}$  in the  
151 seven top rows and the seven individuals with the lowest  $F_{ROH}$  in the seven bottom rows. Panel B shows the  
152 genome-wide ROH prevalence among all 5952 individuals in non-overlapping 500Kb windows. The colour  
153 gradient on Panel B has been scaled according to the ROH prevalence distribution, which is shown as a density  
154 plot in the figure legend.

155  
156 **Inbreeding depression in survival.** Survival is a key fitness component. In Soay sheep, more than  
157 half of all individuals die over their first winter, minimizing their chances to reproduce  
158 (Supplementary Figure 1). The distribution of individual inbreeding coefficients  $F_{ROH}$  in different age  
159 classes revealed that highly inbred individuals rarely survive their early years of life and never reach  
160 old ages (Figure 2A). We modeled this using a binomial animal model with annual survival as a  
161 response, including 15889 observations for 5952 sheep over more than three decades (see Methods  
162 for details). The effect of inbreeding on survival was strong: A 10% increase in  $F_{ROH}$  was associated  
163 with a 68% reduction in the odds of survival ( $\beta$  [95% credible interval, CI] = 0.32 [0.22, 0.45]). Over  
164 the lifetime, inbreeding depression becomes weaker, with the slope of the interaction between  $F_{ROH}$   
165 and age predicting an increase in the odds of survival ( $\beta$  [CI] = 1.19 [1.06, 1.32]). In addition, the

166 slope of the interaction between  $F_{ROH}$  and being a lamb ( $\beta$  [CI] = 1.94 [1.05, 3.34]) indicates that  
 167 inbreeding depression is weaker in lambs, though with considerable uncertainty (Figure 2B). As  
 168 model estimates for odds of survival are not easy to interpret, we plotted the predicted effects of  
 169  $F_{ROH}$  on survival at different life stages (Figure 2C). Lambs (age 0) have a substantially lower survival  
 170 probability but the curve is on average less steep than for individuals at age one, reflecting stronger  
 171 depression in yearlings. Moreover, the three predicted survival curves for the age classes one, four  
 172 and seven differ in slopes, reflecting the estimated decrease of inbreeding depression across life. A  
 173 detailed list of the model estimates including the variable coding and standardization is shown in  
 174 Supplementary Table 4. As an alternative way to visualize the lifetime dynamics of inbreeding  
 175 depression, we also fitted separate models for each age class, which show essentially the same  
 176 pattern (Supplementary Figure 5). Finally we estimated the genetic load in Soay sheep through the  
 177 diploid number of lethal equivalents  $2B$ . Lethal equivalents are a concept rooted in population  
 178 genetics, where one lethal equivalent is equal to a group of mutations which, if dispersed across  
 179 individuals, would on average cause one death<sup>36</sup>. We followed suggestions by Nietlisbach et al<sup>37</sup>  
 180 and refitted the survival model with a Poisson distribution and logarithmic link function using a  
 181 simplified model structure without interactions for a better comparability across studies. This gave  
 182 an estimate of  $2B = 4.57$  (95% CI 2.61-6.55) lethal equivalents for Soay sheep annual survival.  
 183

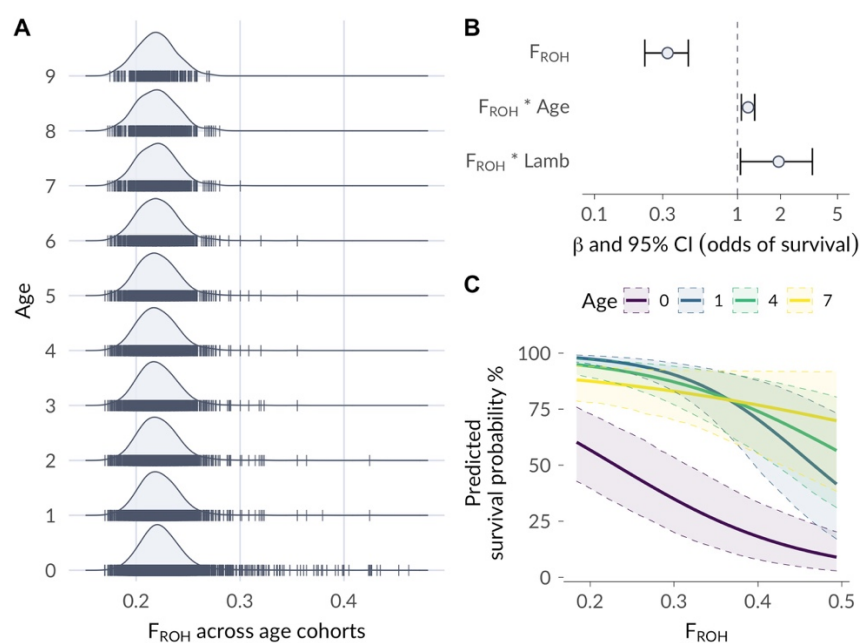

184  
 185 **Figure 2: Inbreeding depression in annual survival.** Panel A shows the distributions of inbreeding  
 186 coefficients  $F_{ROH}$  in Soay sheep age classes ranging from 0 to 10 years. Panel B shows the model estimates  
 187 (posterior mean and 95% CI) for individual inbreeding  $F_{ROH}$  and its interaction with age and being a lamb.  $F_{ROH}$   
 188 has been centered around its mean and transformed so that a unit change and hence the model estimate  
 189 reflects the change in survival probability for a 0.1 increase in  $F_{ROH}$  from the mean. Panel C shows the predicted

190 survival probability and 95% CI over the range of inbreeding coefficients  $F_{ROH}$  for lambs (age 0), and 1, 4 and 7-  
191 year old individuals respectively, while holding sex and twin constant at 1 (male) and 0 (no twin). The predictions  
192 for age classes 1, 4, and 7 exceed the range of the data (panel A) but are shown across the full range for  
193 comparability.

194

195 **Genetic architecture of inbreeding depression.** To quantify the survival consequences of being  
196 IBD at each SNP location, we used a modified genome-wide association study (GWAS). Unlike in  
197 traditional GWAS where p-values of additive SNP effects are of interest, we analysed a binary fixed  
198 effect of ROH status, which indicates whether a focal SNP is in an ROH or not<sup>25,26,38</sup>. We fitted a  
199 binomial mixed model of annual survival for each SNP, with individual ROH status at the focal SNP  
200 position as fixed effect, and controlled for the additive SNP effect and mean individual inbreeding  
201  $F_{ROH}$  (based on all autosomes except for the focal chromosome) alongside a range of other individual  
202 traits and environmental effects (see Methods for details). Under the null hypothesis that ROH status  
203 does not have an effect on survival at any SNP position, we would expect a 50/50 distribution of  
204 negative and positive GWAS effects, as all model estimates are due to chance. In contrast, we found  
205 many more negative than positive effects of ROH status on survival across the genome than expected  
206 by chance (Figure 3A, 3B; 247K neg. vs. 171K pos.; exact binomial test  $p = 2.2 * 10^{-16}$ ). Using binomial  
207 GLMs with effect direction as binary response variable, we also estimated an increasing proportion  
208 of negative effects among larger estimates ( $\beta$  [95% CI] = 0.27 [0.26, 0.28]) and lower p-values ( $\beta$  [95%  
209 CI] = 0.95 [0.94, 0.96]). Consequently, it is likely that many loci with small effects contribute to  
210 inbreeding depression in survival. Moreover, ROH status reached genome-wide significance in three  
211 regions on chromosomes 3, 10, and 23, revealing putative large effect mutations (Figure 3C,  
212 Supplementary Table 5). While largely deleterious recessive variants might be expected to occur in  
213 regions of elevated heterozygosity where they are rarely expressed in their homozygous state, we  
214 did not observe clear common patterns of genetic diversity in these three regions, although  
215 heterozygosity is slightly elevated and ROH frequency is lower around the top SNPs on  
216 chromosomes 10 and 23 (Supplementary Figure 6).

217

218



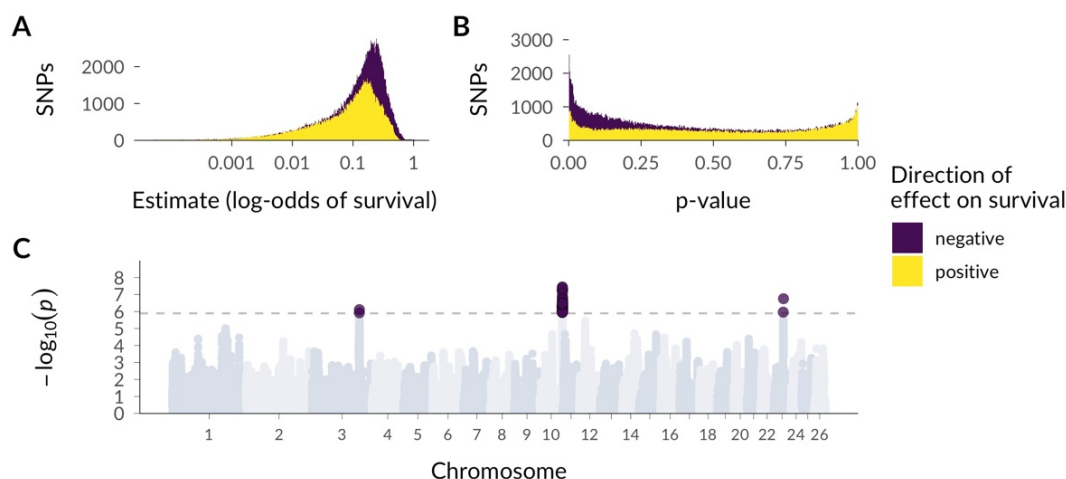

219

220 **Figure 3: GWAS of SNP-wise ROH status effect on annual survival.** Regional inbreeding depression was  
221 conceptualised and tested as a binary fixed effect of whether a SNP was part of an ROH (and hence IBD) or not.  
222 Panel A and B show the distribution of effect sizes and p-values for this SNP-wise ROH effect. The yellow  
223 histograms showing positive effects are superimposed on top of the purple histograms showing negative  
224 effects to highlight that there was a substantially larger proportion of negative ROH status effects than expected  
225 by chance. Panel C shows a Manhattan plot of the SNP-wise ROH status p-values across the genome. The dotted  
226 line marks the genome-wide significance threshold for a Bonferroni correction which was based on the effective  
227 number of tests when accounting for LD. All genome-wide significant p-values were associated with negative  
228 effects on survival.

229

230

## 231 Discussion

232 The Soay sheep on St. Kilda have existed at a small population size and relative isolation for  
233 thousands of years<sup>32</sup>. As a consequence, levels of IBD are high in the population and ROH make up  
234 nearly a quarter of the average autosomal Soay sheep genome. This is more than three times as high  
235 as the average  $F_{ROH}$  estimated across 78 mammal species based on genome-sequence data<sup>39</sup>, but  
236 still slightly lower than in some extremely inbred and very small populations such as mountain  
237 gorillas<sup>40</sup>, Scandinavian grey wolves<sup>15</sup> or Isle Royale wolves<sup>41</sup>. The prevalence of ROH varied  
238 substantially across the genome and was broadly shaped by recombination rate variation, which is  
239 known to impact ROH patterns alongside other factors such as gene density and selection<sup>18,42,43</sup>.  
240 We showed that most chromosomes contain both deserts where ROH are rare and islands where  
241 ROH are common. In the most extreme regions as few as 4% and up to 87% of individuals had ROH  
242 and this has potential implications for the distribution of deleterious mutations. ROH islands are likely  
243 to contain few recessive deleterious alleles, as these are regularly exposed to selection when  
244 homozygous and hence likely to be purged from the population. Expectations for deleterious  
245 mutations in ROH deserts are more difficult to formulate because the (near-) absence of ROH could

246 be caused by several mechanisms, such as a high recombination rate or balancing selection.  
247 However, a lack of ROH could potentially pinpoint regions harbouring lethal or semi-lethal alleles,  
248 though this has only been demonstrated in farm animals using very large sample sizes (e.g. Jenko  
249 et al., 2019).

250  
251 We have only recently begun to understand the precise consequences of inbreeding for individual  
252 fitness in natural populations. In Soay sheep, we found that the odds of survival decrease by 68%  
253 with a mere 10% increase in  $F_{ROH}$ , adding to a small yet growing body of genomic studies showing  
254 that inbreeding depression is stronger in wild populations than previously thought<sup>27-29,31</sup>. Other  
255 recent examples include lifetime breeding success in red deer, which is reduced by up to 95% in  
256 male offspring from half-sib matings<sup>31</sup> and lifetime reproductive success in helmeted honeyeaters,  
257 which is up to 90% lower with a 9% increase in homozygosity<sup>29</sup>. The traditional way to compare  
258 inbreeding depression among studies is to estimate the genetic load of a population using lethal  
259 equivalents<sup>36</sup>, although differences in methodology and inbreeding estimates often do not allow  
260 direct comparisons<sup>37</sup>. We estimated the diploid number of lethal equivalents 2B for Soay sheep  
261 annual survival at 4.57 (95% CI 2.61-6.55). This is a low to moderate inbreeding load compared to  
262 other estimates from wild mammals obtained from appropriate statistical models<sup>37</sup>, but  
263 corroborates with theoretical expectations of lower genetic load in small populations<sup>7</sup> and a recent  
264 comparative study estimating lower genetic load in smaller mammal populations<sup>45</sup>.

265  
266 Inbreeding depression is dynamic across life, and genomic measures are starting to unravel how  
267 inbreeding depression affects fitness at different life-stages in wild populations<sup>27,28,31</sup>. Under the  
268 mutation accumulation hypothesis<sup>46</sup>, the adverse effects of deleterious mutations expressed late in  
269 life should become stronger as selection becomes less efficient. This can theoretically increase the  
270 effects of inbreeding depression later in life<sup>47</sup>, although empirical evidence is sparse<sup>48,49</sup>. In contrast  
271 to the idea of mutation accumulation, we showed that inbreeding depression in Soay sheep  
272 generally becomes weaker over the lifetime. In addition, the sample for each successive age class  
273 consists of increasingly outbred individuals (Figure 2C) due to a higher death rate among inbred  
274 individuals earlier in life. This suggests that the effects of intragenerational purging<sup>50</sup> might  
275 outweigh mutation accumulation in shaping the dynamics of inbreeding depression across the  
276 lifetime. As a notable exception, we estimated inbreeding depression to be slightly weaker in lambs,  
277 which may be because it is partially buffered by maternal care. Parental care has indeed been shown  
278 to reduce inbreeding depression in burying beetles<sup>51</sup>, but there is only limited evidence in mammals

279 to date <sup>52,53</sup>. Overall, we estimated inbreeding depression over a Soay sheep's life to start slightly  
280 weaker in lambs, reaching its maximum in early adulthood and then decrease thereafter.

281  
282 The effect size distribution of loci underpinning inbreeding depression has to our knowledge not  
283 been studied in wild populations using fitness data, although deleterious mutations have been  
284 predicted from sequencing data, for example in ibex and Isle Royale wolves <sup>41,54</sup>. Theoretical  
285 predictions about the relative importance of weakly and strongly deleterious (partially-) recessive  
286 alleles will depend on many factors, such as the distribution of dominance and selection coefficients  
287 for mutations relative to the effective population size, and the frequency of inbreeding <sup>55,56</sup>. However,  
288 we could expect that small populations purge largely deleterious recessive mutations more  
289 efficiently as these are more frequently exposed to selection in the homozygous state <sup>7,57,58</sup>, while  
290 weakly deleterious mutations can more often drift to higher frequencies. We estimated the effect of  
291 ROH status on Soay sheep survival at every SNP position within a GWAS framework. The effect size  
292 distribution contained predominantly negative effects of ROH status on survival, particularly towards  
293 larger effect sizes, showing that likely many alleles with weakly deleterious effects (or low  
294 frequencies) contribute to inbreeding depression in survival.

295  
296 Three regions in the genome also harboured putatively strongly deleterious alleles. This is  
297 unexpected, as Soay sheep have a long-term small population size with an estimated  $N_e$  of 197 <sup>35</sup>,  
298 and highly deleterious recessive mutations should be rapidly purged. On the one hand however, it  
299 is possible that genetic drift counteracted the effects of purifying selection and allowed deleterious  
300 mutations to increase in frequency and be detected in a GWAS. On the other hand, a relatively recent  
301 admixture event with the Dunface sheep breed around 150 years ago <sup>33</sup> could have introduced  
302 deleterious variants into the population and recent selection has not been efficient enough to purge  
303 them from the population yet. Identifying the loci carrying these strongly deleterious recessive  
304 alleles will be challenging as ROH overlapping a given SNP vary in length among individuals, which  
305 makes it difficult to pinpoint an exact effect location. Nevertheless, it is possible to identify the  
306 haplotypes harbouring deleterious recessive alleles with large effects and monitor their frequency  
307 changes in real time in natural populations, or select out individuals carrying them in conservation  
308 breeding programs. To sum up, our study showed how genome-wide marker information for a large  
309 sample of individuals with known fitness can deepen our understanding of the genetic architecture  
310 and lifetime dynamics of inbreeding depression in the wild.

311

312

## 313 **Methods**

314 **Study population, pedigree assembly and annual survival measurements.** The Soay sheep is a  
315 primitive sheep breed descended from Bronze Age domestic sheep and has lived unmanaged on  
316 the St. Kilda archipelago, Scotland for thousands of years. When the last human inhabitants left St.  
317 Kilda in 1932, 107 Soays were transferred to the largest island, Hirta, and have roamed the island  
318 freely and unmanaged ever since. The population increased and fluctuates nowadays between 600  
319 and 2200 individuals. A part of the population in the Village Bay area of Hirta (57°49'N, 8°34'W) has  
320 been the subject of a long-term individual based study since 1985<sup>32</sup>. Most individuals born in the  
321 study area (95%) are ear-tagged and DNA samples are obtained from ear punches or blood  
322 sampling. Routine mortality checks are conducted throughout the year with peak mortality occurring  
323 at the end of winter and beginning of spring. Overall, around 80% of deceased animals are found<sup>27</sup>.  
324 For the analyses in this paper, survival was defined as dying (0) or surviving (1) from the 1<sup>st</sup> May of  
325 the previous year to the 30<sup>th</sup> April of that year, with measures available for 5952 individuals from  
326 1979 to 2018. We focused on annual measures as this allowed us to incorporate the effects of age  
327 and environmental variation.

328 To assemble the pedigree, we inferred parentage for each individual using 438 unlinked SNP  
329 markers from the Ovine SNP50 BeadChip, on which most individuals since 1990 have been  
330 genotyped<sup>59</sup>. Based on these 438 markers, we inferred pedigree relationships using the R package  
331 Sequoia<sup>60</sup>. In the few cases where no SNP genotypes were available, we used either field  
332 observations (for mothers) or microsatellites<sup>61</sup>. All animal work was carried out according to UK  
333 Home Office procedures and was licensed under the UK Animals (Scientific Procedures) Act of 1986  
334 (Project License no. PPL70/8818).

335

336 **Genotyping.** We genotyped a total of 7,700 Soay on the Illumina Ovine SNP50 BeadChip containing  
337 51,135 SNP markers. To control for marker quality, we first filtered for SNPs with minor allele  
338 frequency (MAF) > 0.001, SNP locus genotyping success > 0.99 and individual sheep genotyping  
339 success > 0.95. We then used the check.marker function in GenABEL version 1.8-0<sup>62</sup> with the same  
340 thresholds, including identity by state with another individual < 0.9. This resulted in a dataset  
341 containing 39,368 polymorphic SNPs in 7700 sheep. In addition, we genotyped 188 sheep on the  
342 Ovine Infinium HD SNP BeadChip containing 606,066 SNP loci. These sheep were specifically  
343 selected to maximise the genetic diversity represented in the full population as described in  
344 Johnston et al.<sup>63</sup>, and underwent the same quality control as above, resulting in 430,702  
345 polymorphic SNPs for 188 individuals. All genotype positions were based on the Oar\_v3.1 sheep  
346 genome assembly (GenBank assembly ID GCA\_000298735.1<sup>64</sup>)

347

348 **Genotype imputation.** In order to impute genotypes to high density, we merged the datasets from  
349 the 50K SNP chip and from the HD SNP chip using PLINK v1.90b6.12 with `-bmerge` <sup>65</sup>. This resulted  
350 in a dataset with 436,117 SNPs including 33,068 SNPs genotyped on both SNP chips. For genotype  
351 imputation, we discarded SNPs on the X chromosome and focused on the 419,281 SNPs located on  
352 autosomes. The merged dataset contained nearly complete genotype information for 188  
353 individuals which have been genotyped on the HD chip, and genotypes at 38,130 SNPs for 7700  
354 individuals which have been genotyped on the 50K chip. To impute the missing SNPs, we used  
355 AlphasImpute v1.98 <sup>34</sup>, which combines information on shared haplotypes and pedigree  
356 relationships for phasing and genotype imputation. AlphasImpute works on a per-chromosome basis,  
357 and phasing and imputation are controlled using a parameter file (for the exact parameter file, see  
358 analysis code). Briefly, we phased individuals using core lengths ranging from 1% to 5% of the SNPs  
359 on a given chromosome over 10 iterations, resulting in a haplotype library. Based on the haplotype  
360 library, missing alleles were imputed using the heuristic method over five iterations which allowed  
361 us to use genotype information imputed in previous iterations. We only retained imputed genotypes  
362 for which all phased haplotypes matched and did not allow for errors. We also discarded SNPs with  
363 call rates below 95% after imputation. Overall, this resulted in a dataset with 7691 individuals,  
364 417,373 SNPs and a mean genotyping rate per individual of 99.5 % (range 94.8%-100%).

365 To evaluate the accuracy of the imputation we used 10-fold leave-one-out cross-validation. In each  
366 iteration, we masked the genotypes unique to the high-density chip for one random individual that  
367 had been genotyped at high-density (HD) and imputed the masked genotypes. This allowed a direct  
368 comparison between the true and imputed genotypes. The imputation accuracy of the HD  
369 individuals should reflect of the average imputation accuracy across the whole population, because  
370 HD individuals were selected to be representative of the genetic variation observed across the  
371 pedigree (see Johnston et al., 2016 for details).

372

373 **ROH calling and individual inbreeding coefficients.** The final dataset contained genotypes at  
374 417,373 SNPs autosomal SNPs for 5925 individuals for which annual survival data was available. We  
375 called runs of homozygosity (ROH) with a minimum length of 1200Kb and spanning at least 50 SNPs  
376 with the `--homozyg` function in Plink <sup>65</sup> and the following parameters: `--homozyg-window-snp 50 --`  
377 `homozyg-snp 50 --homozyg-kb 1200 --homozyg-gap 300 --homozyg-density 200 --homozyg-`  
378 `window-missing 2 --homozyg-het 2 --homozyg-window-het 2`. We chose 1200Kb as the minimum  
379 ROH length because between-individual variability in ROH abundance becomes very low for shorter  
380 ROH. Moreover, ROH of length 1200Kb extend well above the LD half decay in the population, thus

381 capturing variation in IBD due to more recent inbreeding rather than linkage disequilibrium  
382 (Supplementary Figure 7). The minimum ROH length of 1200Kb also reflects the expected length  
383 when the underlying IBD haplotypes had a most recent common ancestor haplotype 32 generations  
384 ago, calculated as  $(100 / (2 * g))$  cM / 1.28 cM/Mb where  $g$  is 32 generations and 1.28 is the sex-  
385 averaged genome-wide recombination rate in Soay sheep <sup>63,66</sup>. We then calculated individual  
386 inbreeding coefficients  $F_{ROH}$  by summing up the total length of ROH for each individual and dividing  
387 this by the total autosomal genome length (2,452Mb).

388

389 **ROH landscape and recombination rate variation.** To quantify variation in population-wide ROH  
390 prevalence across the genome, we used a sliding window approach. We first calculated the number  
391 of ROH overlapping each SNP position in the population using PLINK --homozyg. We then  
392 calculated the mean number of ROH overlapping SNPs in 500 Kb non-overlapping sliding windows  
393 in the population (Figure 1B). To estimate the top 0.5% ROH deserts and islands, we discarded  
394 windows with less than 35 SNPs (the percentile of windows with the lowest SNP density). To estimate  
395 the relationship between ROH prevalence and recombination rate we then quantified the  
396 recombination rate in 500Kb window. We calculated recombination rate as the sum of the  
397 recombination fractions  $r$  between consecutive loci in each window, using data from the Soay sheep  
398 linkage map <sup>63</sup>. We then constructed a linear mixed model in lme4 <sup>67</sup> with population-wide ROH  
399 prevalence per window as response, window recombination rate and chromosome size as fixed  
400 effects and chromosome ID as random intercept (Supplementary Table 3). The fixed effects in the  
401 model were standardised using z-transformation. To estimate confidence intervals, we used  
402 parametric bootstrapping implemented in the tidy function of the broom.mixed package <sup>68</sup>.

403

404 **Modelling inbreeding depression in survival.** We modelled the effects of inbreeding depression  
405 in annual survival using a Bayesian animal model in INLA <sup>69</sup>. Annual survival data consists of a series  
406 of 1s followed by a 0 in the year of a sheep's death, or only a 0 if it died as a lamb, and we  
407 consequently used a binomial distribution with a logit link for the model. We used the following  
408 model structure:

409

$$410 \quad \Pr(surv_i = 1) = \text{logit}^{-1}(\beta_0 + F_{ROH_i}\beta_1 + age_i\beta_2 + sex_i\beta_3 + twin_i\beta_4 + lamb_i\beta_5 + F_{ROH_i}age_i\beta_6 +$$
$$411 \quad F_{ROH_i}lamb_i\beta_7 + \alpha_j^{capture\ year} + \alpha_k^{birth\ year} + \alpha_i^{id} + u_i^{ped})$$

412

$$413 \quad \alpha_j^{capture\ year} \sim N(0, \sigma_{year}^2), \quad \text{for } j = 1, \dots, 40$$

$$414 \quad \alpha_k^{birth\ year} \sim N(0, \sigma_{birth\ year}^2), \quad \text{for } k = 1, \dots, 40$$

$$\begin{aligned} 415 \quad \alpha_l^{id} &\sim N(0, \sigma_{id}^2), & \text{for } l = 1, \dots, 5925 \\ 416 \quad u_l^{ped} &\sim N(0, A\sigma_A^2) & \text{for } l = 1, \dots, 5925 \end{aligned}$$

417

418 Here,  $\Pr(surv_i = 1)$  is the probability of survival for observation  $i$ , which depends on the intercept  
419  $\beta_0$ , a series of fixed effects  $\beta_1$  to  $\beta_7$ , the random effects  $\alpha$  which are assumed to be normally  
420 distributed with mean 0 and variance  $\sigma^2$  and the breeding values  $u_i^{ped}$  which have a dependency  
421 structure corresponding to the pedigree, with a mean of 0 and a variance of  $A\sigma_A^2$ , where A is the  
422 relationship matrix and  $\sigma_A^2$  is the additive genetic variance. As fixed effects, we fitted the individual  
423 inbreeding coefficient  $F_{ROH}$  (continuous), the *age* of the individual (continuous), *sex* (0 = female, 1 =  
424 male), a variable indicating whether an individual was born as a *twin* (0 = singleton, 1 = twin) and  
425 whether the individual is a *lamb* before its first year of age (0 = not a lamb, 1 = lamb). We also fitted  
426 an interaction term of  $F_{ROH}$  with *age* to estimate how inbreeding depression changes across the  
427 lifetime and an interaction term of  $F_{ROH}$  with *lamb* to estimate potential differences in inbreeding  
428 depression in lambs, as they receive maternal care which could ameliorate inbreeding depression.  
429 As random intercepts we fitted the birth year of an individual, the capture year to account for survival  
430 variation among years and the sheep identity to account for repeated measures. Finally, we  
431 controlled for additive genetic relatedness by including a covariance structure proportional to the  
432 pedigree relatedness matrix, as has previously been described for INLA models<sup>70</sup>. For all random  
433 effects, we used log-gamma priors with both shape and inverse-scale parameter values of 0.5.

434 To be able to interpret the slopes of the main effects of  $F_{ROH}$  and *age* despite their interactions at the  
435 mean value of the respective other variable (rather than at 0), we centered both variables<sup>71,72</sup>.  
436 Furthermore, we transformed  $F_{ROH}$  from its original range 0-1 to 0-10, which allowed us to directly  
437 interpret model estimates as resulting from a 10% increase in genome-wide IBD rather than the  
438 difference between a completely outbred and a completely inbred individual. Finally, we report  
439 model estimates on the response scale (as odds of survival) in the main paper, and on the link scale  
440 (as log-odds of survival) in the Supplementary Material.

441

442 **Estimating lethal equivalents.** The traditional way of comparing inbreeding depression among  
443 studies is to quantify the inbreeding load in terms of lethal equivalents, i.e. a group of genes which  
444 would cause on average one death if dispersed in different individuals and made homozygous<sup>36</sup>.  
445 However, differences in statistical methodology and inbreeding measures make it difficult to  
446 compare the strength of inbreeding depression in terms of lethal equivalents among studies<sup>37</sup>.  
447 Here, we used the approach suggested by Nietlisbach et al. (2019) and refitted the survival animal  
448 model with a Poisson distribution and a logarithmic link function. We were interested in lethal





483 disequilibrium to create a SNP correlation matrix and calculates the effective number of independent  
484 tests. We then used this value for a Bonferroni correction <sup>74</sup> of p-values resulting in a genome-wide  
485 significance threshold of  $p < 1.28 * 10^{-6}$ .

486

#### 487 **Data availability**

488 Data will be deposited on Dryad upon acceptance.

489

#### 490 **Code availability**

491 All code was written in R 3.6.1 <sup>75</sup> and all plots were made with ggplot2 <sup>76</sup>. The full analysis code is  
492 available on GitHub ([https://github.com/mastoffel/sheep\\_ID](https://github.com/mastoffel/sheep_ID)).

493

#### 494 **Acknowledgements**

495 We thank the National Trust for Scotland for permission to work on St. Kilda and QinetiQ, Eurest and  
496 Kilda Cruises for logistics and support. We thank I. Stevenson and many volunteers who have helped  
497 with fieldwork on the island and all those who have contributed to keeping the project going. SNP  
498 genotyping was conducted the Wellcome Trust Clinical Research Facility Genetic Core. This work  
499 has made extensive use of the Edinburgh Compute and Data Facility (<http://www.ecdf.ed.ac.uk/>).  
500 We thank John Hickey, Steve Thorn, Andrew Whalen and Martin Johnsson for help with the  
501 imputation. We are grateful for discussions with David Clark, Jon Slate, Jisca Huisman, Jarrod  
502 Hadfield, Peter Visscher, Anna Hewett, Deborah and Brian Charlesworth and the Wild Evolution  
503 Group. We also thank Emily Humble for comments on an earlier draft of the manuscript. The project  
504 was funded through an outgoing Postdoc fellowship from the German Science Foundation (DFG)  
505 awarded to MAS and a Leverhulme Grant (RPG-2019-072) awarded to JMP and SEJ. Field data  
506 collection has been supported by NERC over many years, and most of the SNP genotyping was  
507 supported by an ERC Advanced Grant to JMP.

508

509

510

511

512 **References**

- 513 1. Darwin, C. *The effect of cross and self fertilization in the vegetable kingdom*. (John Murray,  
514 1876).
- 515 2. Angeloni, F., Ouborg, N. J. & Leimu, R. Meta-analysis on the association of population size and  
516 life history with inbreeding depression in plants. *Biological Conservation* **144**, 35-43 (2011).
- 517 3. Bozzuto, C., Biebach, I., Muff, S., Ives, A. R. & Keller, L. F. Inbreeding reduces long-term growth  
518 of Alpine ibex populations. *Nature ecology & evolution* **3**, 1359-1364 (2019).
- 519 4. Charlesworth, D. & Willis, J. H. The genetics of inbreeding depression. *Nature Reviews*  
520 *Genetics* (2009).
- 521 5. Clark, D. W. *et al.* Associations of autozygosity with a broad range of human phenotypes.  
522 *Nature Communications* **10**, 1-17 (2019).
- 523 6. Crnokrak, P. & Roff, D. A. Inbreeding depression in the wild. *Heredity* **83**, 260-270 (1999).
- 524 7. Hedrick, P. W. & Garcia-Dorado, A. Understanding inbreeding depression, purging, and  
525 genetic rescue. *Trends in ecology & evolution* **31**, 940-952 (2016).
- 526 8. Keller, L. Inbreeding effects in wild populations. *Trends in ecology & evolution* **17**, 230-241  
527 (2002).
- 528 9. Ralls, K., Ballou, J. D. & Templeton, A. Estimates of lethal equivalents and the cost of  
529 inbreeding in mammals. *Conservation biology* **2**, 185-193 (1988).
- 530 10. Kardos, M., Taylor, H. R., Ellegren, H., Luikart, G. & Allendorf, F. W. Genomics advances the  
531 study of inbreeding depression in the wild. *Evolutionary applications* **9**, 1205-1218 (2016).
- 532 11. Hedrick, P. W. What is the evidence for heterozygote advantage selection? *Trends in ecology &*  
533 *evolution* **27**, 698-704 (2012).
- 534 12. Pemberton, J. Measuring inbreeding depression in the wild: the old ways are the best. *Trends*  
535 *in ecology & evolution* **19**, 613-615 (2004).
- 536 13. Wright, S. Coefficients of Inbreeding and Relationship. *The American Naturalist* **56**, 330-338  
537 (1922).
- 538 14. Franklin, I. R. The distribution of the proportion of the genome which is homozygous by  
539 descent in inbred individuals. *Theoretical population biology* **11**, 60-80 (1977).
- 540 15. Kardos, M. *et al.* Genomic consequences of intensive inbreeding in an isolated wolf  
541 population. *Nature Ecology & Evolution* **2**, 124-131 (2018).
- 542 16. Kardos, M., Luikart, G. & Allendorf, F. W. Measuring individual inbreeding in the age of  
543 genomics: marker-based measures are better than pedigrees. *Heredity* **115**, 63 (2015).

- 544 17. Broman, K. W. & Weber, J. L. Long homozygous chromosomal segments in reference families  
545 from the centre d'Etude du polymorphisme humain. *The American Journal of Human Genetics*  
546 **65**, 1493–1500 (1999).
- 547 18. Gibson, J., Morton, N. E. & Collins, A. Extended tracts of homozygosity in outbred human  
548 populations. *Hum Mol Genet* **15**, 789–795 (2006).
- 549 19. McQuillan, R. *et al.* Runs of homozygosity in European populations. *The American Journal of*  
550 *Human Genetics* **83**, 359–372 (2008).
- 551 20. Curik, I., Ferenčaković, M. & Sölkner, J. Inbreeding and runs of homozygosity: A possible  
552 solution to an old problem. *Livestock Science* **166**, 26–34 (2014).
- 553 21. Leroy, G. Inbreeding depression in livestock species: review and meta-analysis. *Animal*  
554 *Genetics* **45**, 618–628 (2014).
- 555 22. Ceballos, F. C., Joshi, P. K., Clark, D. W., Ramsay, M. & Wilson, J. F. Runs of homozygosity:  
556 windows into population history and trait architecture. *Nature Reviews Genetics* (2018).
- 557 23. Kijas, J. W. Detecting regions of homozygosity to map the cause of recessively inherited  
558 disease. in *Genome-wide association studies and genomic prediction* 331–345 (Springer,  
559 2013).
- 560 24. Lander, E. S. & Botstein, D. Homozygosity mapping: a way to map human recessive traits with  
561 the DNA of inbred children. *Science* **236**, 1567–1570 (1987).
- 562 25. Ferenčaković, M., Sölkner, J., Kapš, M. & Curik, I. Genome-wide mapping and estimation of  
563 inbreeding depression of semen quality traits in a cattle population. *Journal of Dairy Science*  
564 **100**, 4721–4730 (2017).
- 565 26. Pryce, J. E., Haile-Mariam, M., Goddard, M. E. & Hayes, B. J. Identification of genomic regions  
566 associated with inbreeding depression in Holstein and Jersey dairy cattle. *Genetics Selection*  
567 *Evolution* **46**, (2014).
- 568 27. Béréanos, C., Ellis, P. A., Pilkington, J. G. & Pemberton, J. M. Genomic analysis reveals  
569 depression due to both individual and maternal inbreeding in a free-living mammal  
570 population. *Molecular ecology* **25**, 3152–3168 (2016).
- 571 28. Chen, N., Cosgrove, E. J., Bowman, R., Fitzpatrick, J. W. & Clark, A. G. Genomic consequences  
572 of population decline in the endangered Florida scrub-jay. *Current Biology* **26**, 2974–2979  
573 (2016).
- 574 29. Harrisson, K. A. *et al.* Lifetime Fitness Costs of Inbreeding and Being Inbred in a Critically  
575 Endangered Bird. *Current Biology* **29**, 2711–2717.e4 (2019).

- 576 30. Hoffman, J. I. *et al.* High-throughput sequencing reveals inbreeding depression in a natural  
577 population. *Proceedings of the National Academy of Sciences of the United States of America*  
578 **111**, 3775–3780 (2014).
- 579 31. Huisman, J., Kruuk, L. E., Ellis, P. A., Clutton-Brock, T. & Pemberton, J. M. Inbreeding  
580 depression across the lifespan in a wild mammal population. *Proceedings of the National*  
581 *Academy of Sciences* **113**, 3585–3590 (2016).
- 582 32. Clutton-Brock, T. H. & Pemberton, J. M. *Soay sheep: dynamics and selection in an island*  
583 *population*. (Cambridge University Press, 2004).
- 584 33. Feulner, P. G. D. *et al.* Introgression and the fate of domesticated genes in a wild mammal  
585 population. *Molecular Ecology* **22**, 4210–4221 (2013).
- 586 34. Hickey, J. M., Kinghorn, B. P., Tier, B., van der Werf, J. H. & Cleveland, M. A. A phasing and  
587 imputation method for pedigreed populations that results in a single-stage genomic  
588 evaluation. *Genetics Selection Evolution* **44**, 9 (2012).
- 589 35. Kijas, J. W. *et al.* Genome-Wide Analysis of the World's Sheep Breeds Reveals High Levels of  
590 Historic Mixture and Strong Recent Selection. *PLOS Biology* **10**, e1001258 (2012).
- 591 36. Morton, N. E., Crow, J. F. & Muller, H. J. An estimate of the mutational damage in man from  
592 data on consanguineous marriages. *Proceedings of the National Academy of Sciences of the*  
593 *United States of America* **42**, 855 (1956).
- 594 37. Nietlisbach, P., Muff, S., Reid, J. M., Whitlock, M. C. & Keller, L. F. Nonequivalent lethal  
595 equivalents: Models and inbreeding metrics for unbiased estimation of inbreeding load.  
596 *Evolutionary applications* **12**, 266–279 (2019).
- 597 38. Keller, M. C. *et al.* Runs of homozygosity implicate autozygosity as a schizophrenia risk factor.  
598 *PLoS genetics* **8**, (2012).
- 599 39. Brüniche-Olsen, A., Kellner, K. F., Anderson, C. J. & DeWoody, J. A. Runs of homozygosity  
600 have utility in mammalian conservation and evolutionary studies. *Conservation Genetics* **19**,  
601 1295–1307 (2018).
- 602 40. Xue, Y. *et al.* Mountain gorilla genomes reveal the impact of long-term population decline and  
603 inbreeding. *Science* **348**, 242–245 (2015).
- 604 41. Robinson, J. A. *et al.* Genomic signatures of extensive inbreeding in Isle Royale wolves, a  
605 population on the threshold of extinction. *Science Advances* **5**, eaau0757 (2019).
- 606 42. Wang, H., Lin, C.-H., Chen, Y., Freimer, N. & Sabatti, C. Linkage disequilibrium and haplotype  
607 homozygosity in population samples genotyped at a high marker density. *Human heredity* **62**,  
608 175–189 (2006).

- 609 43. Pemberton, T. J. *et al.* Genomic patterns of homozygosity in worldwide human populations.  
610 *The American Journal of Human Genetics* **91**, 275–292 (2012).
- 611 44. Jenko, J. *et al.* Analysis of a large dataset reveals haplotypes carrying putatively recessive lethal  
612 and semi-lethal alleles with pleiotropic effects on economically important traits in beef cattle.  
613 *Genetics Selection Evolution* **51**, 9 (2019).
- 614 45. van der Valk, T., de Manuel, M., Marques-Bonet, T. & Guschanski, K. Estimates of genetic load  
615 in small populations suggest extensive purging of deleterious alleles. *bioRxiv* 696831 (2019).
- 616 46. Medawar, P. B. *An Unsolved Problem of Biology*. (H.K. Lewis, 1952).
- 617 47. Charlesworth, B. & Hughes, K. A. Age-specific inbreeding depression and components of  
618 genetic variance in relation to the evolution of senescence. *Proceedings of the National*  
619 *Academy of Sciences* **93**, 6140–6145 (1996).
- 620 48. Husband, B. C. & Schemske, D. W. Evolution of the magnitude and timing of inbreeding  
621 depression in plants. *Evolution* **50**, 54–70 (1996).
- 622 49. Wilson, A. J. *et al.* Evidence for a genetic basis of aging in two wild vertebrate populations.  
623 *Current Biology* **17**, 2136–2142 (2007).
- 624 50. Enders, L. S. & Nunney, L. Reduction in the cumulative effect of stress-induced inbreeding  
625 depression due to intragenerational purging in *Drosophila melanogaster*. *Heredity* **116**, 304  
626 (2016).
- 627 51. Pilakouta, N., Jamieson, S., Moorad, J. A. & Smiseth, P. T. Parental care buffers against  
628 inbreeding depression in burying beetles. *Proceedings of the National Academy of Sciences*  
629 **112**, 8031–8035 (2015).
- 630 52. Nielsen, J. F. *et al.* Inbreeding and inbreeding depression of early life traits in a cooperative  
631 mammal. *Molecular Ecology* **21**, 2788–2804 (2012).
- 632 53. Wells, D. A., Cant, M. A., Nichols, H. J. & Hoffman, J. I. A high-quality pedigree and genetic  
633 markers both reveal inbreeding depression for quality but not survival in a cooperative  
634 mammal. *Molecular ecology* **27**, 2271–2288 (2018).
- 635 54. Grosse, C., Guillaume, F., Keller, L. F. & Croll, D. Purging of highly deleterious mutations  
636 through severe bottlenecks in Alpine ibex. *Nature Communications* **11**, 1–12 (2020).
- 637 55. Bataillon, T. & Kirkpatrick, M. Inbreeding depression due to mildly deleterious mutations in  
638 finite populations: size does matter. *Genetics Research* **75**, 75–81 (2000).
- 639 56. Glémin, S. How are deleterious mutations purged? Drift versus nonrandom mating. *Evolution*  
640 **57**, 2678–2687 (2003).
- 641 57. Kyriazis, C. C., Wayne, R. K. & Lohmueller, K. E. High genetic diversity can contribute to  
642 extinction in small populations. *bioRxiv* 678524 (2019).

- 643 58. Robinson, J. A., Brown, C., Kim, B. Y., Lohmueller, K. E. & Wayne, R. K. Purging of strongly  
644 deleterious mutations explains long-term persistence and absence of inbreeding depression  
645 in island foxes. *Current Biology* **28**, 3487–3494 (2018).
- 646 59. Bérénos, C., Ellis, P. A., Pilkington, J. G. & Pemberton, J. M. Estimating quantitative genetic  
647 parameters in wild populations: a comparison of pedigree and genomic approaches.  
648 *Molecular ecology* **23**, 3434–3451 (2014).
- 649 60. Huisman, J. Pedigree reconstruction from SNP data: parentage assignment, sibship clustering  
650 and beyond. *Molecular ecology resources* **17**, 1009–1024 (2017).
- 651 61. Morrissey, M. B. *et al.* The prediction of adaptive evolution: empirical application of the  
652 secondary theorem of selection and comparison to the breeder's equation. *Evolution:  
653 International Journal of Organic Evolution* **66**, 2399–2410 (2012).
- 654 62. Aulchenko, Y. S., Ripke, S., Isaacs, A. & Van Duijn, C. M. GenABEL: an R library for genome-  
655 wide association analysis. *Bioinformatics* **23**, 1294–1296 (2007).
- 656 63. Johnston, S. E., Bérénos, C., Slate, J. & Pemberton, J. M. Conserved Genetic Architecture  
657 Underlying Individual Recombination Rate Variation in a Wild Population of Soay Sheep (*Ovis*  
658 *aries*). *Genetics* **203**, 583–598 (2016).
- 659 64. Jiang, Y. *et al.* The sheep genome illuminates biology of the rumen and lipid metabolism.  
660 *Science* **344**, 1168–1173 (2014).
- 661 65. Purcell, S. *et al.* PLINK: a tool set for whole-genome association and population-based linkage  
662 analyses. *The American Journal of Human Genetics* **81**, 559–575 (2007).
- 663 66. Thompson, E. A. Identity by descent: variation in meiosis, across genomes, and in populations.  
664 *Genetics* **194**, 301–326 (2013).
- 665 67. Bates, D., Mächler, M., Bolker, B. & Walker, S. Fitting linear mixed-effects models using lme4.  
666 *Journal of Statistical Software* **67**, (2015).
- 667 68. Bolker, B. & Robinson, D. *broom.mixed: Tidying Methods for Mixed Models. R package version*  
668 *0.2.4.* (2019).
- 669 69. Rue, H., Martino, S. & Chopin, N. Approximate Bayesian inference for latent Gaussian models  
670 by using integrated nested Laplace approximations. *Journal of the royal statistical society:  
671 Series b (statistical methodology)* **71**, 319–392 (2009).
- 672 70. Holand, A. M., Steinsland, I., Martino, S. & Jensen, H. Animal models and integrated nested  
673 Laplace approximations. *G3: Genes, Genomes, Genetics* **3**, 1241–1251 (2013).
- 674 71. Gelman, A. & Hill, J. *Data analysis using regression and multilevel/hierarchical models.*  
675 (Cambridge university press, 2006).

- 676 72. Schielzeth, H. Simple means to improve the interpretability of regression coefficients. *Methods*  
677 *in Ecology and Evolution* (2010).
- 678 73. Gao, X., Starmer, J. & Martin, E. R. A multiple testing correction method for genetic association  
679 studies using correlated single nucleotide polymorphisms. *Genetic Epidemiology: The Official*  
680 *Publication of the International Genetic Epidemiology Society* **32**, 361–369 (2008).
- 681 74. Holm, S. A simple sequentially rejective multiple test procedure. *Scandinavian journal of*  
682 *statistics* 65–70 (1979).
- 683 75. R Core Team. *R: A language and environment for statistical computing*. R Foundation for  
684 *Statistical Computing*. (2019).
- 685 76. Wickham, H. *ggplot2: elegant graphics for data analysis*. (Springer, 2016).
- 686
